# Supplementary material for: Konzeption und Implementierung eines Zertifizierungssystems zur Qualitätssicherung der Cochlea-Implantat-Versorgung in Deutschland
Source: Springer Nature journal article supplement (doi:10.1007/s00106-023-01305-x), 2023-04-28
Supplement: MOESM1 [file 25294914]

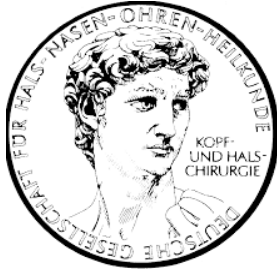

Deutsche Gesellschaft für  
Hals-Nasen-Ohren-Heilkunde,  
Kopf- und Hals-Chirurgie e.V.

## **Erhebungs- und Kennzahlenbogen**

**zur Erstzertifizierung von Cochlea-Implantat(CI)-versorgenden  
Einrichtungen**

**Inkraftsetzung am 07.07.2021  
durch die Zertifizierungskommission**

© 2021  
Stand:

N1 (25.08.2022)

## Präambel

Die Anforderungen der Zertifizierung von CI-versorgenden Einrichtungen (CIVE) beruhen auf dem Weißbuch der Cochlea-Implantat(CI)-Versorgung und werden mit diesem Erhebungs- und Kennzahlenbogen erhoben.

## Abkürzungsverzeichnis

|            |                                                                                |
|------------|--------------------------------------------------------------------------------|
| CI         | Cochlea-Implantat                                                              |
| CIVE       | CI-versorgende Einrichtung (implantierende HNO-Klinik)                         |
| DGHNO-KHC  | Deutsche Gesellschaft für Hals-Nasen-Ohren-Heilkunde, Kopf- und Hals-Chirurgie |
| HNO        | Hals-Nasen-Ohren-Heilkunde                                                     |
| MTA-F      | Medizinisch-technische Assistent/in für Funktionsdiagnostik                    |
| DGA        | Deutsche Gesellschaft für Audiologie                                           |
| MPSV       | Medizinprodukte-Sicherheitsplanverordnung                                      |
| MPBetreibV | Medizinprodukte-Betreiberverordnung                                            |
| MPG        | Medizinproduktegesetz                                                          |

## Ausfüllhinweise

Sofern eine Anforderung nicht erfüllt wird, ist eine Kommentierung durch die Einrichtung notwendig.

 Eingaben durch das Zentrum erforderlich, tlw. mit Dropdown-Menü

 Eingabe durch Einrichtung optional

 Anforderung scheint nicht erfüllt, bitte begründen

 Keine Eingabe erforderlich

## Erklärung

Zur Vereinfachung und leichterem Lesbarkeit wird im Folgenden für die einzelnen Personenkategorien nur die männliche Form verwendet.

Bitte verwenden Sie, sofern vorhanden, die Dropdown-Funktion. Diese Datei wurde auf einem Windows-Rechner mit Microsoft Office 2013 erstellt.

Die Verwendung von älteren Office-Versionen oder anderen Kalkulationsprogrammen kann unter Umständen zu Einschränkungen und Funktionalitätsverlusten führen.

**Erhebungs- und Kennzahlenbogen zur Erstzertifizierung als Cochlea-Implantat(CI)-versorgende Einrichtung gemäß den Anforderungen der DGHNO-KHC**

**Legende**

|  |                                        |
|--|----------------------------------------|
|  | Eingabe durch Einrichtung optional     |
|  | Eingabe durch Einrichtung erforderlich |

**Stammdaten**

|                                  |             |
|----------------------------------|-------------|
| Reg. Nr.                         | CIVE: _____ |
| Einrichtungsnamen                | _____       |
| Straße                           | _____       |
| Hausnummer                       | _____       |
| PLZ                              | _____       |
| Ort                              | _____       |
| Ärztliche Leitung                | _____       |
| Einrichtung mit Kinderversorgung | _____       |

**Weitergehende Beschreibungen zur Darlegung der Anforderungserfüllung**

| 1. Allgemeine Aspekte der CI-Versorgung |                  |                                                                                                                                                                                                           |                       |                                 |
|-----------------------------------------|------------------|-----------------------------------------------------------------------------------------------------------------------------------------------------------------------------------------------------------|-----------------------|---------------------------------|
| Nr.                                     | Kapitel Weißbuch | Anforderung                                                                                                                                                                                               | Anforderungserfüllung | Kommentierung durch Einrichtung |
| 1                                       | ---              | Wird das Weißbuch als Grundlage für die Struktur und Arbeit Ihrer CI-versorgenden Einrichtung (CIVE) verwendet?                                                                                           |                       |                                 |
| 2                                       | 1.               | Wird die Verantwortung für den Gesamtprozess der CI-Versorgung durch die CIVE getragen?                                                                                                                   |                       |                                 |
| 3                                       | 1.               | Werden alle Teilschritte des Versorgungsprozesses (Präoperative Evaluation, Operation, Basistherapie (Erlernungsphase), Folgetherapie (Rehabilitation), Nachsorge) von der CIVE verantwortlich angeboten? |                       |                                 |
| 4                                       | --               | Erfolgt an der CIVE die CI-Versorgung von Erwachsenen?                                                                                                                                                    |                       |                                 |
| 5                                       | --               | Erfolgt an der CIVE die CI-Versorgung von Kindern?                                                                                                                                                        |                       |                                 |

| 2. Strukturelle Voraussetzungen |                  |                                                                                                                                                           |                       |                                 |
|---------------------------------|------------------|-----------------------------------------------------------------------------------------------------------------------------------------------------------|-----------------------|---------------------------------|
| Nr.                             | Kapitel Weißbuch | Anforderung                                                                                                                                               | Anforderungserfüllung | Kommentierung durch Einrichtung |
| 6                               | 2.1              | Wird ein interdisziplinäres Expertenteam / Kooperationsstruktur vorgehalten (gemäß Weißbuch Kap. 2.1)?                                                    |                       |                                 |
| 7                               | 3.1.6            | Findet eine strukturierte und dokumentierte interdisziplinäre Fallkonferenz statt?                                                                        |                       |                                 |
| 8                               | 3.2.2            | Stehen durchgehend Konsildienste für Intensivmedizin, Neurochirurgie, Neuroradiologie und Pädiatrische Anästhesiologie und Intensivmedizin zur Verfügung? |                       |                                 |

| 3. Personelle Mindestausstattung |                  |                                                                                                                  |      |     |                       |                                 |
|----------------------------------|------------------|------------------------------------------------------------------------------------------------------------------|------|-----|-----------------------|---------------------------------|
| Nr.                              | Kapitel Weißbuch | Kennzahl                                                                                                         | Soll | Ist | Anforderungserfüllung | Kommentierung durch Einrichtung |
| 9                                | 2.3              | Über wie viele HNO-Fachärzte, die auf CI spezialisiert sind, verfügt die CIVE?                                   | 2    |     | Eingabe erforderlich  |                                 |
| 10                               | 2.3              | Über wie viele CI-spezialisierte Audiologen gemäß Qualifikationsprofil, verfügt die CIVE?                        | 1    |     | Eingabe erforderlich  |                                 |
| 11                               | 2.3              | Über wie viele Hörtechniker gemäß Qualifikationsprofil verfügt die CIVE?                                         | 1    |     | Eingabe erforderlich  |                                 |
| 12                               | 2.3              | Über wie viele MTA-F oder Audiologie-Assistenten/-innen verfügt die CIVE?                                        | 2    |     | Eingabe erforderlich  |                                 |
| 13                               | 2.3              | <b>Bei Kinderversorgung:</b> Über wie viele Fachärzte für Phoniatrie & Pädiatrische Audiologie verfügt die CIVE? | 1    |     | Eingabe erforderlich  |                                 |
| 14                               | 2.3              | Über wie viele Therapeuten der sprach- / sprachtherapeutischen Berufsgruppen verfügt die CIVE?                   | 2    |     | Eingabe erforderlich  |                                 |

| 4. Apparative Voraussetzung |                  |                                                                                                                                                                                                    |                       |                                 |
|-----------------------------|------------------|----------------------------------------------------------------------------------------------------------------------------------------------------------------------------------------------------|-----------------------|---------------------------------|
| Nr.                         | Kapitel Weißbuch | Anforderung                                                                                                                                                                                        | Anforderungserfüllung | Kommentierung durch Einrichtung |
| 15                          | 2.5              | Verfügt die CIVE über Hard- und Software zur Überprüfung konventioneller Hörgeräte?                                                                                                                |                       |                                 |
| 16                          | 2.5              | Verfügt die CIVE über Hard- und Software zur Anpassung für mind. 3 verschiedene CI-Implantatsysteme?                                                                                               |                       |                                 |
| 17                          | 2.5              | Verfügt die CIVE über eine Messanlage für klick- und frequenzspezifische BERA, ASSR und CERA (DIN EN 60645-7:2010-08) (mit der Möglichkeit zur Messung in Narkose/Sedierung bei Kinderversorgung)? |                       |                                 |
| 18                          | 2.5              | Verfügt die CIVE über die Möglichkeit zur Elektrocochleographie (mit der Möglichkeit zur Messung in Narkose/Sedierung bei Kinderversorgung)?                                                       |                       |                                 |
| 19                          | 3.2.2            | Steht eine Röntgenuntersuchung zur intraoperativen Lagekontrolle des CI zur Verfügung?                                                                                                             |                       |                                 |
| 20                          | 3.2.3            | Steht ein Hirnnervenmonitoring / Facialismonitoring intraoperativ zur Verfügung?                                                                                                                   |                       |                                 |
| 21                          | 3.2.3            | Steht eine E-Bera intraoperativ zur Verfügung?                                                                                                                                                     |                       |                                 |

| 5. Mindestpatientenzahlen |                  |                                                                                                                                                                             |                       |                                 |
|---------------------------|------------------|-----------------------------------------------------------------------------------------------------------------------------------------------------------------------------|-----------------------|---------------------------------|
| Nr.                       | Kapitel Weißbuch | Anforderung                                                                                                                                                                 | Anforderungserfüllung | Kommentierung durch Einrichtung |
| 22                        | 2.6              | Werden an der CIVE mind. 1000 Routine-Audiometrie-Untersuchungen pro Jahr durchgeführt?                                                                                     |                       |                                 |
| 23                        | 2.6              | Werden an der CIVE mind. 100 spezielle audiologische Untersuchungen pro Jahr durchgeführt? (z. B. Abklärung CI-Indikation und pädiatrische Diagnostik bei Kinderversorgung) |                       |                                 |

| 6. Prozessablauf |                  |                                                                                                                                                                                 |                                                                                                                                                    |                                                                                                                                                                                                                                                                                                                                                                                                                                                                                                                                                                                                                                                                                                                                                                                                                                                                                                                                                                                                                                                                                                                                                                                                                                                                                                                                                                                                                                                                                                                                                                                         |
|------------------|------------------|---------------------------------------------------------------------------------------------------------------------------------------------------------------------------------|----------------------------------------------------------------------------------------------------------------------------------------------------|-----------------------------------------------------------------------------------------------------------------------------------------------------------------------------------------------------------------------------------------------------------------------------------------------------------------------------------------------------------------------------------------------------------------------------------------------------------------------------------------------------------------------------------------------------------------------------------------------------------------------------------------------------------------------------------------------------------------------------------------------------------------------------------------------------------------------------------------------------------------------------------------------------------------------------------------------------------------------------------------------------------------------------------------------------------------------------------------------------------------------------------------------------------------------------------------------------------------------------------------------------------------------------------------------------------------------------------------------------------------------------------------------------------------------------------------------------------------------------------------------------------------------------------------------------------------------------------------|
| Nr.              | Kapitel Weißbuch | Anforderung                                                                                                                                                                     | Anforderungserfüllung                                                                                                                              | Kommentierung durch Einrichtung                                                                                                                                                                                                                                                                                                                                                                                                                                                                                                                                                                                                                                                                                                                                                                                                                                                                                                                                                                                                                                                                                                                                                                                                                                                                                                                                                                                                                                                                                                                                                         |
| 24               | 3.1.1            | Ist die Durchführung der Hörgeräteoptimierung in der CI-Versorgung gewährleistet?                                                                                               |                                                                                                                                                    |                                                                                                                                                                                                                                                                                                                                                                                                                                                                                                                                                                                                                                                                                                                                                                                                                                                                                                                                                                                                                                                                                                                                                                                                                                                                                                                                                                                                                                                                                                                                                                                         |
| 25               | 3.2.2            | Werden Implantate von mind. 3 verschiedenen Herstellern angeboten?                                                                                                              |                                                                                                                                                    |                                                                                                                                                                                                                                                                                                                                                                                                                                                                                                                                                                                                                                                                                                                                                                                                                                                                                                                                                                                                                                                                                                                                                                                                                                                                                                                                                                                                                                                                                                                                                                                         |
| 26               | 3.2.4            | Wird die CI-Versorgung unter vollstationären Bedingungen durchgeführt?                                                                                                          |                                                                                                                                                    |                                                                                                                                                                                                                                                                                                                                                                                                                                                                                                                                                                                                                                                                                                                                                                                                                                                                                                                                                                                                                                                                                                                                                                                                                                                                                                                                                                                                                                                                                                                                                                                         |
| 27               | 3.3              | Werden die geforderten Anteile am Versorgungsprozess durch Ihre CIVE erbracht?                                                                                                  | <p>Bitte geben Sie in der rechten Spalte mittels Klick auf 'ja' bzw. 'nein' an, ob die entsprechende Versorgung durch Ihre CIVE erbracht wird.</p> | <p>Präoperative Evaluation <input type="radio"/> ja <input type="radio"/> nein</p> <p>Operation <input type="radio"/> ja <input type="radio"/> nein</p> <p>Basistherapie</p> <p>Audiologische Basistherapie <input type="radio"/> ja <input type="radio"/> nein</p> <p>Hörtherapeutische Basistherapie <input type="radio"/> ja <input type="radio"/> nein</p> <p>Sprachtherapeutische Basistherapie <input type="radio"/> ja <input type="radio"/> nein</p> <p>Medizinische Kontrolle <input type="radio"/> ja <input type="radio"/> nein</p> <p>Folgetherapie</p> <p>Audiologische Folgetherapie <input type="radio"/> ja <input type="radio"/> nein</p> <p>Hörtherapeutische Folgetherapie <input type="radio"/> ja <input type="radio"/> nein</p> <p>Sprachtherapeutische Folgetherapie <input type="radio"/> ja <input type="radio"/> nein</p> <p>Medizinische Kontrolle <input type="radio"/> ja <input type="radio"/> nein</p> <p>Nachsorge</p> <p>Audiologische Nachsorge <input type="radio"/> ja <input type="radio"/> nein</p> <p>Hörtherapeutische Nachsorge <input type="radio"/> ja <input type="radio"/> nein</p> <p>Sprachtherapeutische Nachsorge <input type="radio"/> ja <input type="radio"/> nein</p> <p>Medizinische Kontrolle <input type="radio"/> ja <input type="radio"/> nein</p> <p>Technische Nachsorge <input type="radio"/> ja <input type="radio"/> nein</p> <p>Grau hinterlegt: in der CIVE zu erbringende Prozessanteile (nicht delegierbar)</p> <p>Weiß hinterlegt: unter Verantwortung der CIVE Delegation von Prozessanteilen optional möglich</p> |
| 28               | 3.3              | Wird für erwachsene Patienten die hörtherapeutische (und ggf. die sprachtherapeutische) Basistherapie, Folgetherapie (Rehabilitation) und Nachsorge verantwortlich eingeleitet? |                                                                                                                                                    |                                                                                                                                                                                                                                                                                                                                                                                                                                                                                                                                                                                                                                                                                                                                                                                                                                                                                                                                                                                                                                                                                                                                                                                                                                                                                                                                                                                                                                                                                                                                                                                         |
| 29               | 3.3.1            | Wird für Kinder eine interdisziplinäre, pädagogisch und hör-sprachtherapeutisch orientierte Rehabilitation (Folgetherapie) verantwortlich eingeleitet?                          |                                                                                                                                                    |                                                                                                                                                                                                                                                                                                                                                                                                                                                                                                                                                                                                                                                                                                                                                                                                                                                                                                                                                                                                                                                                                                                                                                                                                                                                                                                                                                                                                                                                                                                                                                                         |
| 30               | 3.5              | Wird die jährliche Nachsorge durch die CIVE angeboten?                                                                                                                          |                                                                                                                                                    |                                                                                                                                                                                                                                                                                                                                                                                                                                                                                                                                                                                                                                                                                                                                                                                                                                                                                                                                                                                                                                                                                                                                                                                                                                                                                                                                                                                                                                                                                                                                                                                         |

| 7. Qualitätssicherung |                  |                                                                                                                                                       |                       |                                 |
|-----------------------|------------------|-------------------------------------------------------------------------------------------------------------------------------------------------------|-----------------------|---------------------------------|
| Nr.                   | Kapitel Weißbuch | Anforderung                                                                                                                                           | Anforderungserfüllung | Kommentierung durch Einrichtung |
| 31                    | 2.7              | Erfolgt die Wahrnehmung der Aufgaben unter Beachtung der relevanten Verordnungen (MPSV, MPSV, MFC, Schulungen und Re-Zertifizierungen des Personals)? |                       |                                 |
| 32                    | 2.7              | Wird ein CI-Jahresbericht erstellt?                                                                                                                   |                       |                                 |
| 33                    | 4.1              | Wird der CI-Jahresbericht / Qualitätsbericht veröffentlicht?                                                                                          |                       |                                 |
| 34                    | 4.1              | Existiert bereits eine CI-Datenbank in der CIVE?                                                                                                      |                       |                                 |
| 35                    | 4.2              | Ist die Teilnahme der CIVE am Register gewährleistet?                                                                                                 |                       |                                 |
